# Supplementary figures and images for: Clodronate-Liposome Mediated Macrophage Depletion Abrogates Multiple Myeloma Tumor Establishment In Vivo
Source: PubMed Central journal article supplement — Neoplasia. 2019 Jun 24;21(8):777–87. doi: 10.1016/j.neo.2019.05.006 (PMC6593350; doi:10.1016/j.neo.2019.05.006), 2019-06-24

# Supplementary Figure 1

A

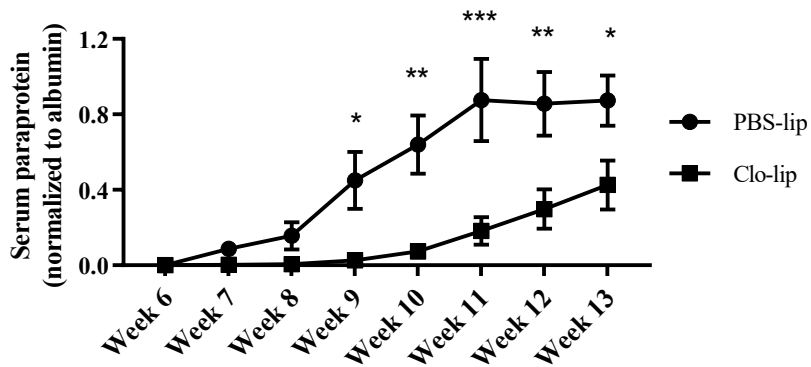

B

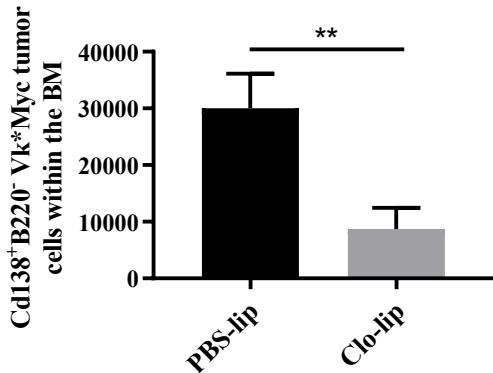

C

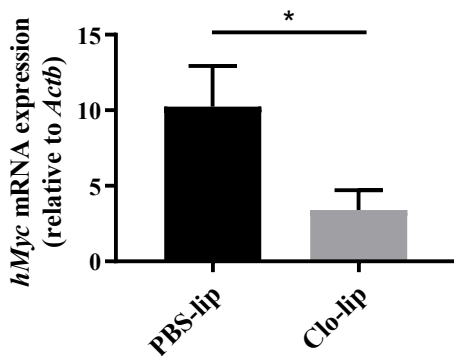

Supplement: mmc3.pdf [file mmc3.pdf]

# Supplementary Figure 3

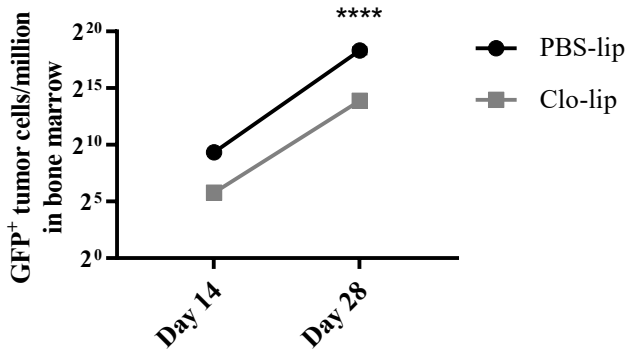

Supplement: mmc5.pdf [file mmc5.pdf]

## Supplementary Figure 6

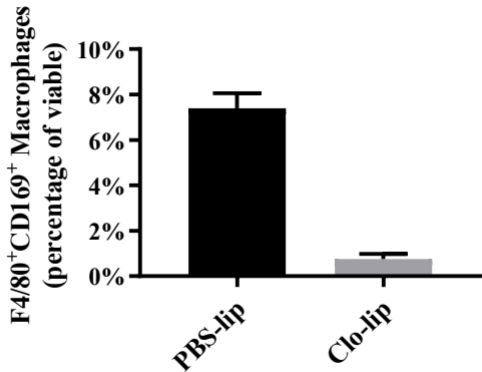

Supplement: mmc8.pdf [file mmc8.pdf]
